# Supplementary material
Source: PubMed Central journal article supplement (PMC10082767)
Supplement: 42003_2023_4762_MOESM1_ESM.pdf [file 42003_2023_4762_MOESM1_ESM.pdf]

## Supplementary Information

for

### Extrinsic stabilization of antiviral ACE2-Fc fusion proteins targeting SARS-CoV-2

Hristo L. Svilenov<sup>1,6\*</sup>, Florent Delhommel<sup>2,3</sup>, Till Siebenmorgen<sup>2,3</sup>, Florian Rührnöβl<sup>1</sup>,  
Grzegorz M. Popowicz<sup>2,3</sup>, Alwin Reiter<sup>4</sup>, Michael Sattler<sup>2,3</sup>, Carsten Brockmeyer<sup>5</sup> and  
Johannes Buchner<sup>1\*</sup>

<sup>1</sup> Center of Functional Protein Assemblies (CPA) and School of Natural Sciences, Department of Biosciences, Technical University of Munich, Garching, Germany.

<sup>2</sup> Institute of Structural Biology, Helmholtz Zentrum München, Neuherberg, Germany.

<sup>3</sup> Bavarian NMR Center, School of Natural Sciences, Department of Biosciences, Technical University of Munich, Garching, 85748, Munich, Germany.

<sup>4</sup> Formycon AG, Martinsried/Planegg, Germany.

<sup>5</sup> Brockmeyer Biopharma GmbH, Senator-Ernst Str. 2, Marzling, Germany

<sup>6</sup> Current affiliation: Faculty of Pharmaceutical Sciences, Ghent University, Ottergemsesteenweg 460, 9000, Ghent, Belgium

\* To whom correspondence should be addressed:

[hristo.svilenov@ugent.be](mailto:hristo.svilenov@ugent.be), <https://orcid.org/0000-0001-5863-9569>

[johannes.buchner@tum.de](mailto:johannes.buchner@tum.de), <https://orcid.org/0000-0003-1282-7737>

phone: +498928913340; fax: +498928913345

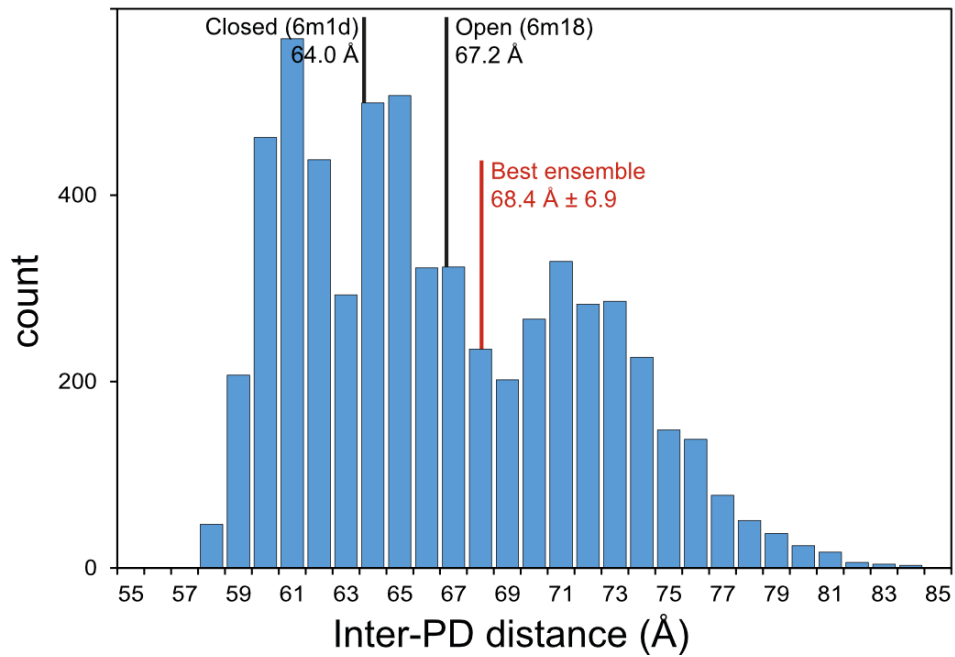

**Supplementary Figure 1.** Distribution of Inter-PD distance from the pool of all ACE2-Fc conformations generated by MD. This pool was used to select a minimum ensemble fitting best the SAXS data, of which the inter-PD distance is indicated (red), as well as for the known structures of ACE2 in the open and closed conformations.

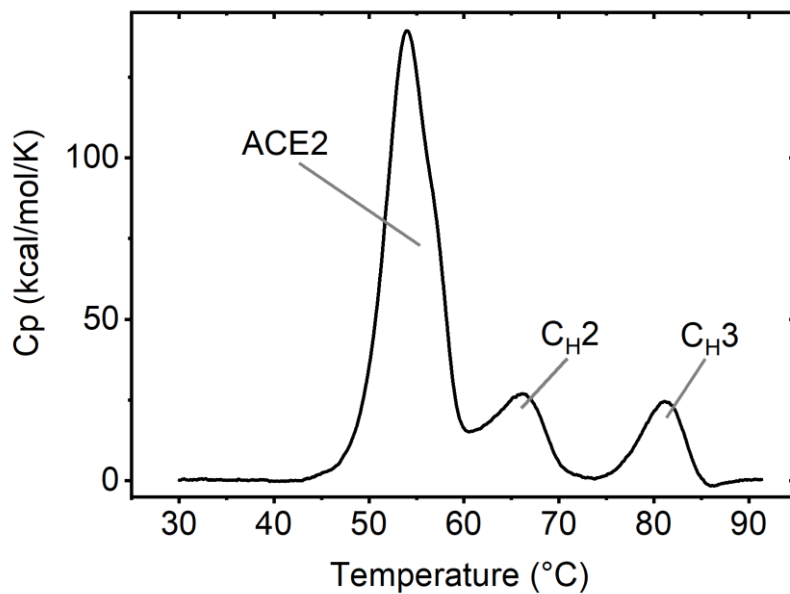

**Supplementary Figure 2.** Differential scanning microcalorimetry analysis of an ACE2-IgG1-Fc.

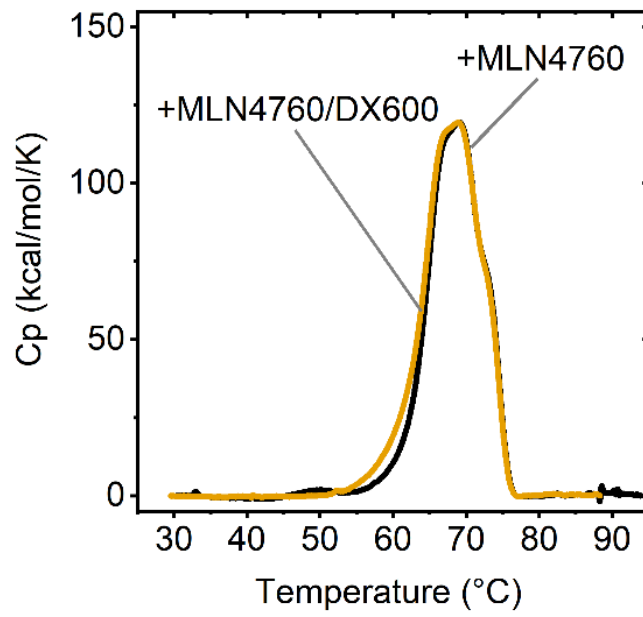

**Supplementary Figure 3.** DSC analysis of 5  $\mu\text{M}$  ACE2-IgG4-Fc in the presence of 50  $\mu\text{M}$  MLN4760 or 50  $\mu\text{M}$  MLN4760 plus 50  $\mu\text{M}$  DX600

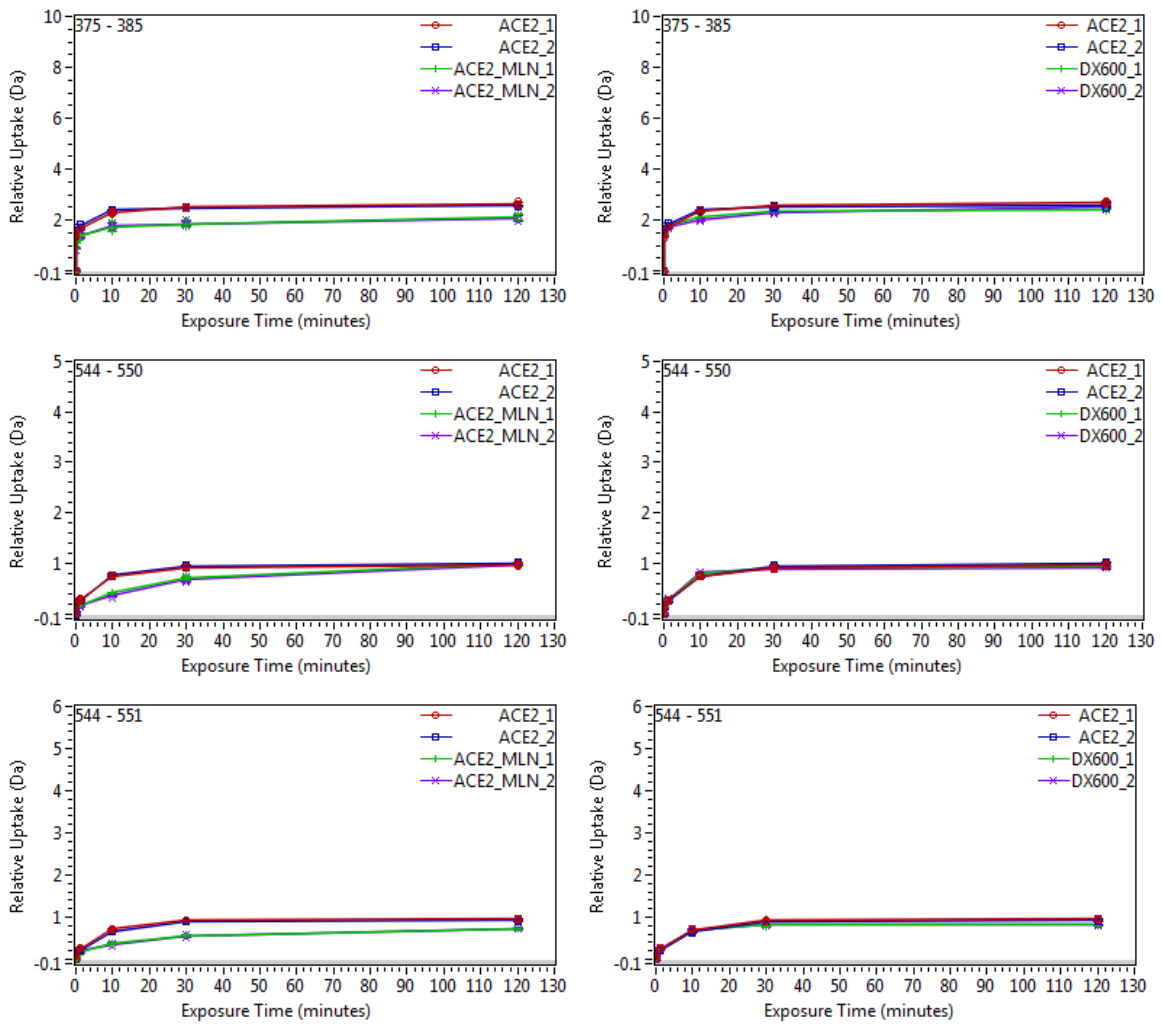

**Supplementary Figure 4.** Deuterium uptake plots of other peptides in the hinge region between the two subdomains of ACE2 PD. The ACE2 indicates ACE2-IgG4-Fc without inhibitors, ACE2\_MLN is ACE2-IgG4-Fc in the presence of MLN4760, DX600 is ACE2-IgG4-Fc in the presence of DX600.

a)

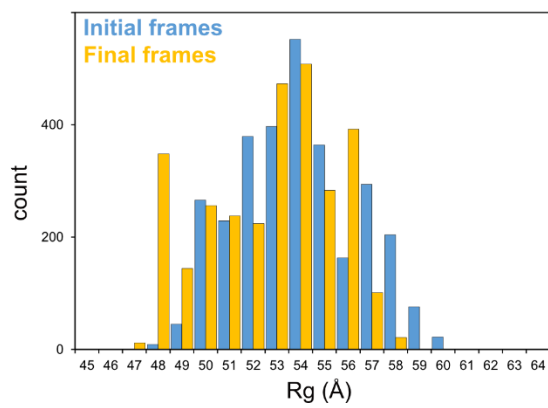

b)

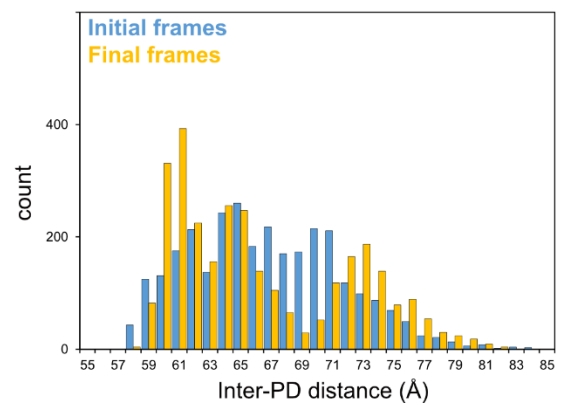

**Supplementary Figure 5.** Comparison of the first (blue) and the final (yellow) half of the MD simulation runs. **a)** R<sub>g</sub> distribution and **b)** inter-PD distance distribution show the same general trend in both subsets.

**Supplementary Table 1.** Overview of the attached glycans and the corresponding protein sites.

| Protein Site | Glycan                                                                                             |
|--------------|----------------------------------------------------------------------------------------------------|
| N36,N529     | DGlcNAcb1-4DGlcNAcb1-2DManpa1-6[DGlcNAcb1-2DManpa1-3]DManpb1-4DGlcNAcb1-4DGlcNAca1-OH              |
| N73, N673    | DGlcNAcb1-2DManpa1-6[DGalpb1-4DGlcNAcb1-2DManpa1-3]DManpb1-4DGlcNAcb1-4[LFucpa1-3]DGlcNAca1-OH     |
| N86, N415    | DGlcNAcb1-2DManpa1-6[DGlcNAcb1-2DManpa1-3]DManpb1-4DGlcNAcb1-4[LFucpa1-3]DGlcNAca1-OH              |
| N305         | DGlcNAcb1-2DManpa1-6[DGlcNAcb1-4[DGlcNAcb1-4DGlcNAcb1-2]DManpa1-3]DManpb1-4DGlcNAcb1-4DGlcNAca1-OH |
| T723         | DNeup5Aca2-6[DNeup5Aca2-3DGalpb1-3]DGalpNAca1-OH                                                   |
| N794         | DGlcNAcb1-2DManpb1-6DManpb1-4DGlcNAcb1-4[LFucpa1-6]DGlcNAca1-OH                                    |

**Supplementary Table 2.** Overview of the properties and associated values used for the MD simulations.

| Property                                     | Value                             |
|----------------------------------------------|-----------------------------------|
| Simulation box dimensions                    | 14 Å minimum distance to box edge |
| Total number of atoms glycosylated           | 593412                            |
| Total number of water molecules glycosylated | 186666                            |
| Total number of ions                         | 58                                |
| Thermostat                                   | Langevin                          |
| Collision frequency in ps <sup>-1</sup>      | 2                                 |
| Protein force field                          | FF14SB                            |
| Glycan force field                           | GLYCAM_06j-1                      |
| Water force field                            | TIP3P                             |
| Nonbonded cutoff                             | 8.5 Å                             |
